# Supplementary material for: Assessment of children with pectus excavatum without surgical correction
Source: Springer Nature journal article supplement (doi:10.1007/s00508-018-1406-0), 2018-11-12
Supplement: MOESM1 [file 16267888]

**Appendix. Questionnaire of children adherence to physical activity program** (to be completed by the parent)

|  | Always  5 | Very often  4 | Sometimes  3 | Rarely  2 | Never  1 |
| --- | --- | --- | --- | --- | --- |
| 1. Have the training sessions fitted the daily routine of your child? |  |  |  |  |  |
| 2. Has your child found the physical activity program easy to perform? |  |  |  |  |  |
| 3. Has your child found the physical activity program entertaining? |  |  |  |  |  |
| 4. Has your child followed the physiotherapist’s instructions during the program? |  |  |  |  |  |
| 5. Have you been confident about the results of physical activity program? |  |  |  |  |  |

|  | Strongly agree  5 | Agree  4 | I don’t know  3 | Disagree  2 | Strongly disagree  1 |
| --- | --- | --- | --- | --- | --- |
| 6. Do you consider physical activity program important for your child health? |  |  |  |  |  |
| 7. Do you consider physical activity program important for your child self-esteem? |  |  |  |  |  |
| 8. Do you consider necessary to continue the program with home exercises? |  |  |  |  |  |

9. How much did the exercise program improve your child physical capacity?

0-10 point scale: 0- not at all; 10- very much

10. Your overall satisfaction with the child’s physical activity program:

0-10 point scale: 0- very unsatisfied; 10- very satisfied
